# Supplementary material
Source: MDPI journal article supplement (https://www.mdpi.com/1996-1073/12/8/1546)
Supplement: s1 [file s1]

## Supplementary tables

**Table S1.** Technologies for removing H<sub>2</sub>S from biogas.

| Topic    | Parameter                                             | Physical-Chemical     |                                                                |                     |                     |                                  |                           | Biological                  |                       |                   |                  |
|----------|-------------------------------------------------------|-----------------------|----------------------------------------------------------------|---------------------|---------------------|----------------------------------|---------------------------|-----------------------------|-----------------------|-------------------|------------------|
|          |                                                       | In-situ precipitation | Adsorption-Fe <sub>2</sub> O <sub>3</sub> /Fe(OH) <sub>3</sub> | Adsorption-AC       | Membrane separation | Absorption-NaOH/H <sub>2</sub> O | Biotrickling filter (BTF) | In-situ microaerobic        | Bioscrubbers: Thiopaq | Biopuric (Veolia) | Microalgae-based |
| Influent | Plant size                                            | All                   | All                                                            | All                 | Small/Medium        | Medium/Large                     | All                       |                             |                       |                   |                  |
|          | Max biogas flowrate (m <sup>3</sup> h <sup>-1</sup> ) | 100,000               | 10,000                                                         | 900                 | 1400                | 100,000                          | 1000,000                  | 1,000,000                   | 0.0003-250            | 2500              | 1,000,000        |
|          | Min biogas flowrate (m <sup>3</sup> h <sup>-1</sup> ) | 0                     | 200                                                            | 20                  | 0                   | 100                              | 100                       |                             | 50                    |                   | 100              |
|          | H <sub>2</sub> S (ppmv)                               |                       | 0.9–20                                                         | 0.005–1             |                     | 1–90                             | 500–10,000                |                             | 2500–67,000           | 10,000            | 1000–15,000      |
| Costs    | H <sub>2</sub> S removal (%)                          | 50–70                 | 99                                                             | 96                  | 98                  | 98                               | 90                        | 97                          | 99.5                  | 94                | 100              |
|          | CAPEX (€ Nm <sup>-3</sup> h <sup>-1</sup> )           | Very cheap            | 120–640/Cheap                                                  | 3–120/Cheap         | Very expensive      | Expensive                        | 10–41/Medium              | 10,000–30,000 (€)/Expensive |                       |                   | Medium           |
|          | OPEX (€ Nm <sup>-3</sup> )                            | 0.024/Very expensive  | 0.021–0.037 Medium                                             | 0.0005–0.037 Medium | Expensive           | 0.03/Expensive                   | 0.013–0.016 Very cheap    | 0.0018–0.0037 Very cheap    |                       |                   | Cheap            |
| Te       | Energy consumption (kWh m <sup>-3</sup> )             | Very low              | Low                                                            | Low                 | Very high           | High                             | Very low                  |                             |                       | Low               | 15/Low           |

|       |                         |                        |              |                   |        |                             |                |                            |            |           |
|-------|-------------------------|------------------------|--------------|-------------------|--------|-----------------------------|----------------|----------------------------|------------|-----------|
|       | Space requirements      | Compact technique      |              | Compact technique |        |                             |                | No additional units needed |            |           |
|       | Demand on chemicals     | Yes                    | Yes          | No                | No     | Yes                         |                |                            |            |           |
|       | Problem frequency       | High pressure problems |              |                   |        | Clogging of column possible | Media clogging |                            |            |           |
|       | Operation simplicity    | Low                    | High         | Medium            | High   | High                        | Low            |                            | Low        | Low       |
|       | Robustness              |                        |              |                   |        | High                        |                |                            |            |           |
| Other | CO <sub>2</sub> removal |                        |              |                   | Yes    | Yes                         |                |                            |            |           |
|       | Stage of development    | Conventional           | Conventional | Conventional      |        |                             |                | Innovative                 | Innovative | Lab scale |
|       | Environmental impact    | High                   | High         | High              | Medium | High                        | Low            | Low                        |            | Low       |

**Table S2.** Technologies for removing siloxanes from biogas.

| Topic             | Parameter                                             | Physical-Chemical         |                      |                          |                    |                         | Physical (T <sup>o</sup> ) | Biological              |                           |
|-------------------|-------------------------------------------------------|---------------------------|----------------------|--------------------------|--------------------|-------------------------|----------------------------|-------------------------|---------------------------|
|                   |                                                       | Adsorption-AC             | Adsorption-inorganic | Fluidized bed adsorption | Absorption-Organic | Absorption-Strong acids | Membrane separation        | Deep chilling (-70-0°C) | Biotrickling filter (BTF) |
| Influent          | Plant size                                            | All                       | All                  | Large                    | Medium/Large       | Medium/Large            | Small/Medium               | Large                   | All                       |
|                   | Max biogas flowrate (m <sup>3</sup> h <sup>-1</sup> ) | 150,000                   | 150,000              | 150,000                  | 150,000            | 150,000                 | 500                        | 150,000                 | 150,000                   |
|                   | Min biogas flowrate (m <sup>3</sup> h <sup>-1</sup> ) | 0                         | 0                    | 1000                     | 500                | 500                     | 0                          | 1000                    | 0                         |
|                   | Siloxanes removal (%)                                 | 50–70                     | 99                   | 96                       | 98                 | 50–70                   | 60                         | 83                      | 40                        |
| Costs             | CAPEX (€ Nm <sup>-3</sup> h <sup>-1</sup> )           | Medium                    | Medium               | Expensive                | Very expensive     | Very expensive          | Very expensive             | Very expensive          | Inexpensive               |
|                   | OPEX (€ Nm <sup>-3</sup> )                            | 0.003-0.023/<br>Expensive | Very expensive       | Medium                   | Very expensive     | Very expensive          | Expensive                  | Very expensive          | Very inexpensive          |
| Te <sub>net</sub> | Energy consumption (kWh m <sup>-3</sup> )             | Low                       | Low                  | High                     | Very high          | Very high               | Very high                  | Very high               | Very low                  |

|       |                        |                                                        |                                                        |          |              |                                                      |                |          |          |
|-------|------------------------|--------------------------------------------------------|--------------------------------------------------------|----------|--------------|------------------------------------------------------|----------------|----------|----------|
|       | Problem frequency      | High pressure needed and moisture decreases efficiency | High pressure needed and moisture decreases efficiency |          |              | Corrosion, environmental issues, hazardous chemicals | Media clogging |          |          |
| Other | Environmental impact   | Medium                                                 | High                                                   | Medium   | Very high    | Very high                                            |                | Medium   | Very low |
|       | Stage of development   | Conventional                                           | Lab scale                                              | Emergent | Conventional | Lab scale                                            | Emergent       | Emergent | Emergent |
|       | Pre-treatment required | Yes                                                    | Yes                                                    | No       | No           | No                                                   | No             | No       | No       |

**Table 3.** Technologies for removing/converting CO<sub>2</sub> into CH<sub>4</sub>.

| Topic     | Parameter                                             | Physical-Chemical |                   |                             |                                 | Physical (T <sup>o</sup> ) |                      | Biological                 |                          |                    |
|-----------|-------------------------------------------------------|-------------------|-------------------|-----------------------------|---------------------------------|----------------------------|----------------------|----------------------------|--------------------------|--------------------|
|           |                                                       | Water scrubbing   | Solvent scrubbing | Chemical scrubbing (amines) | Pressure swing adsorption (PSA) | Membrane separation        | Cryogenic separation | Chemoautotrophic upgrading | Photosynthetic upgrading | In situ desorption |
| Influent  | Max biogas flowrate (m <sup>3</sup> h <sup>-1</sup> ) | 2000              | 2000              | 1800                        | 2000                            | 1400                       | 2000                 |                            |                          |                    |
|           | Min biogas flowrate (m <sup>3</sup> h <sup>-1</sup> ) | 0                 | 200               | 600                         | 0                               | 0                          | 20                   |                            |                          |                    |
|           | H <sub>2</sub> S (ppm)                                | 300-2500          | Remove before     | 300                         | No limit                        |                            |                      |                            | No                       |                    |
| Effluent  | CH <sub>4</sub> (%)                                   | 97                | 98                | 99.7                        | 97                              | 97                         | 97                   | 70                         | 90                       | 87                 |
|           | CO <sub>2</sub> (%)                                   | 2                 |                   |                             |                                 |                            |                      | 4                          |                          |                    |
|           | H <sub>2</sub> S (ppm)                                | Removed           |                   |                             | Removed                         | Removed                    |                      | No detected                |                          |                    |
| Costs     | CAPEX (€ Nm <sup>-3</sup> h <sup>-1</sup> )           | 1800–5500         | 250–3000          | 1500–3200                   | 1500–2700                       | 2000–6000                  | 2000–5590            |                            | 500–2000                 |                    |
|           | OPEX (€ Nm <sup>-3</sup> )                            | 9.1–14            | 9–13.8            | 11.2–14.4                   | 9.2–12.8                        | 8.3–13.3                   | 7–25                 |                            |                          |                    |
| Technical | Energy consumption (kWh m <sup>-3</sup> )             | 0.2–0.3           | 0.2–0.4           | 0.55–0.9                    | 0.23–0.3                        | 0.15–0.76                  | 0.6–1.8              | Low                        | Low                      | Low                |
|           | Space requirements                                    | High              | Medium            | Medium                      | Low                             | Low                        | Low                  |                            |                          |                    |

|       |                            |                        |              |                              |              |              |           |           |           |           |
|-------|----------------------------|------------------------|--------------|------------------------------|--------------|--------------|-----------|-----------|-----------|-----------|
|       | Demand on chemicals        | No                     | Yes          | Yes                          | No           | No           | No        | Yes       | No        | Yes       |
|       | Problem frequency          | Microbial growth, foam |              | Foam, amine degradation/loss |              |              |           |           |           |           |
|       | Operation simplicity       | High                   | Low          | Low                          | Low          | High         | Low       |           |           |           |
|       | Technical availability     | 95.5                   | 97           | 93.5                         | 95           | 96.5         |           |           |           |           |
|       | CH <sub>4</sub> losses (%) | 1.5                    | 2            | 0.09                         | 3            | 0.5          | 1.9       | 1         | 0.9       | 8         |
| Other | Environmental impact       | High                   | Very high    | Medium                       | Very high    | High         | Very high | Low       | Low       | Low       |
|       | Stage of development       | Conventional           | Conventional | Conventional                 | Conventional | Conventional | Emergent  | Lab scale | Lab scale | Lab scale |
|       | Pre-treatment required     | Yes                    | Yes          |                              | No           | No           | No        | No        | No        |           |
